# Supplementary material for: Development of 65 Novel Polymorphic cDNA-SSR Markers in Common Vetch (Vicia sativa subsp. sativa) Using Next Generation Sequencing
Source: PubMed Central journal article supplement (PMC6270072; doi:10.3390/molecules18078376), 2013-07-16

## Supplementary Materials

**Figure S1.** SSR marker banding profile of 32 common vetch accessions using primer GBSSR-VSpS-181.

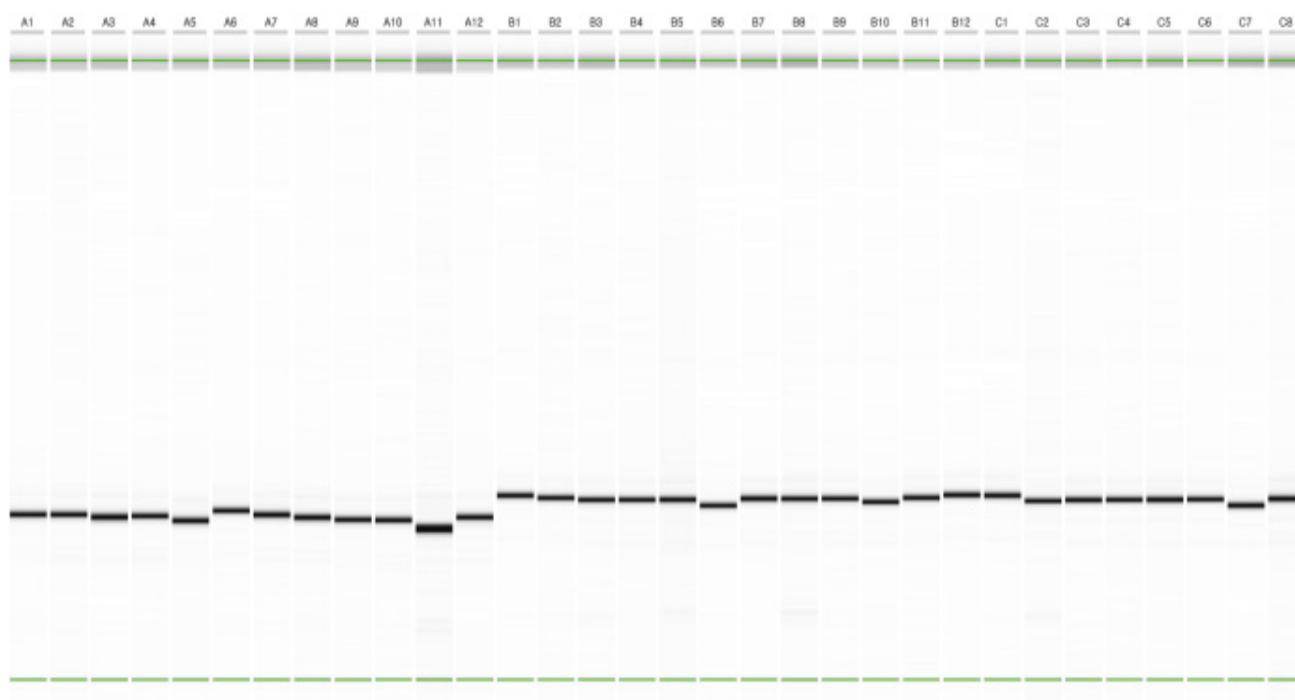

Supplement: molecules-18-08376-s001.pdf [file molecules-18-08376-s001.pdf]
